# Supplementary material for: Feature engineering with clinical expert knowledge: A case study assessment of machine learning model complexity and performance
Source: PubMed Central journal article supplement (PMC7179831; doi:10.1371/journal.pone.0231300), 2020-04-23
Supplement: pone.0231300.s001.pdf [file pone.0231300.s001.pdf]

**S1 Table. Clinically meaningful prescription triplets ranked by discriminative score.**

| Anchor prescription event | Laboratory test name               | $MI_{score}$ |
|---------------------------|------------------------------------|--------------|
| Xopenex                   | Oxygen saturation                  | 0.170        |
| Albuterol Sulfate         | Bicarbonate                        | 0.160        |
| Salmeterol                | pH                                 | 0.123        |
| Xopenex                   | CO2 (ETCO2, PCO2, etc.)            | 0.079        |
| Xopenex                   | Bicarbonate                        | 0.064        |
| Xopenex                   | Partial pressure of carbon dioxide | 0.061        |
| Salmeterol                | CO2 (ETCO2, PCO2, etc.)            | 0.053        |
| Methylprednisolone        | Bicarbonate                        | 0.038        |
| Budesonide                | Bicarbonate                        | 0.033        |
| Budesonide                | Oxygen saturation                  | 0.029        |
| Xopenex                   | pH                                 | 0.023        |
| Salmeterol                | Bicarbonate                        | 0.016        |
| Dexamethasone             | CO2 (ETCO2, PCO2, etc.)            | 0.015        |
| Dexamethasone             | Partial pressure of carbon dioxide | 0.015        |
| Dexamethasone             | Positive end-expiratory pressure   | 0.012        |
| Dexamethasone             | Lactate                            | 0.012        |
| Albuterol                 | Oxygen saturation                  | 0.008        |
| Albuterol                 | Positive end-expiratory pressure   | 0.007        |
| Salmeterol                | Partial pressure of carbon dioxide | 0.006        |
| Dexamethasone             | pH                                 | 0.006        |
| Albuterol                 | CO2 (ETCO2, PCO2, etc.)            | 0.005        |
| Albuterol                 | Bicarbonate                        | 0.005        |
| Albuterol                 | Partial pressure of carbon dioxide | 0.004        |
| Methylprednisolone        | pH                                 | 0.003        |
| Dexamethasone             | Bicarbonate                        | 0.002        |
| Albuterol                 | pH                                 | 0.001        |
| Albuterol Sulfate         | pH                                 | 0            |

$MI_{score}$  = mutual information score
