# Supplementary material for: Feature engineering with clinical expert knowledge: A case study assessment of machine learning model complexity and performance
Source: PubMed Central journal article supplement (PMC7179831; doi:10.1371/journal.pone.0231300), 2020-04-23
Supplement: pone.0231300.s002.pdf [file pone.0231300.s002.pdf]

**S2 Table. Clinically meaningful procedure triplets ranked by discriminative score.**

| Anchor procedure event                   | Laboratory test name               | $MI_{score}^1$ |
|------------------------------------------|------------------------------------|----------------|
| Unplanned Extubation (patient-initiated) | Partial pressure of carbon dioxide | 0.15           |
| Thoracentesis                            | CO2 (ETCO2, PCO2, etc.)            | 0.12           |
| Unplanned Extubation (patient-initiated) | Bicarbonate                        | 0.09           |
| Percutaneous Tracheostomy                | Bicarbonate                        | 0.08           |
| Thoracentesis                            | Partial pressure of carbon dioxide | 0.08           |
| Percutaneous Tracheostomy                | Partial pressure of carbon dioxide | 0.07           |
| Unplanned Extubation (patient-initiated) | CO2 (ETCO2, PCO2, etc.)            | 0.06           |
| Invasive Ventilation                     | Oxygen saturation                  | 0.06           |
| Intubation                               | Oxygen saturation                  | 0.05           |
| Percutaneous Tracheostomy                | CO2 (ETCO2, PCO2, etc.)            | 0.05           |
| Percutaneous Tracheostomy                | pH                                 | 0.04           |
| Thoracentesis                            | Bicarbonate                        | 0.04           |
| Thoracentesis                            | pH                                 | 0.03           |
| Non-invasive Ventilation                 | Oxygen saturation                  | 0.03           |
| Extubation                               | Lactate                            | 0.03           |
| Intubation                               | Lactate                            | 0.02           |
| Cardioversion/Defibrillation             | Partial pressure of carbon dioxide | 0.02           |
| Dialysis - CRRT                          | Blood urea nitrogen                | 0.02           |
| Extubation                               | Oxygen saturation                  | 0.02           |
| Cardioversion/Defibrillation             | Bicarbonate                        | 0.02           |
| Cardioversion/Defibrillation             | pH                                 | 0.01           |
| Non-invasive Ventilation                 | CO2 (ETCO2, PCO2, etc.)            | 0.01           |
| Cardioversion/Defibrillation             | CO2 (ETCO2, PCO2, etc.)            | 0.01           |
| Dialysis Catheter                        | Potassium                          | 0.01           |
| Bronchoscopy                             | Partial pressure of carbon dioxide | 0.01           |
| Dialysis Catheter                        | Bicarbonate                        | 0.01           |
| Interventional Radiology                 | White blood cell count             | 0.01           |
| Dialysis Catheter                        | pH                                 | 0.01           |
| Cardioversion/Defibrillation             | Lactate                            | 0.01           |
| Non-invasive Ventilation                 | Partial pressure of carbon dioxide | 0.00           |
| Non-invasive Ventilation                 | Bicarbonate                        | 0.00           |
| Extubation                               | pH                                 | 0.00           |
| Extubation                               | Bicarbonate                        | 0.00           |
| Invasive Ventilation                     | Partial pressure of carbon dioxide | 0.00           |
| Dialysis - CRRT                          | pH                                 | 0.00           |
| Dialysis - CRRT                          | Creatinine                         | 0.00           |
| Intubation                               | Bicarbonate                        | 0.00           |
| Invasive Ventilation                     | CO2 (ETCO2, PCO2, etc.)            | 0.00           |
| Dialysis - CRRT                          | Bicarbonate                        | 0.00           |
| Intubation                               | CO2 (ETCO2, PCO2, etc.)            | 0.00           |
| Invasive Ventilation                     | Lactate                            | 0.00           |
| Intubation                               | pH                                 | 0.00           |
| Intubation                               | Partial pressure of carbon dioxide | 0.00           |
| Extubation                               | CO2 (ETCO2, PCO2, etc.)            | 0.00           |
| Non-invasive Ventilation                 | pH                                 | 0.00           |
| Bronchoscopy                             | pH                                 | 0.00           |
| Non-invasive Ventilation                 | Lactate                            | 0.00           |
| Dialysis - CRRT                          | Potassium                          | 0.00           |
| Invasive Ventilation                     | Bicarbonate                        | 0.00           |
| Invasive Ventilation                     | pH                                 | 0.00           |
| Bronchoscopy                             | CO2 (ETCO2, PCO2, etc.)            | 0.00           |
| Extubation                               | Partial pressure of carbon dioxide | 0.00           |
| Dialysis Catheter                        | Creatinine                         | 0.00           |
| Dialysis Catheter                        | Blood urea nitrogen                | 0.00           |
| Unplanned Extubation (patient-initiated) | pH                                 | 0.00           |
