# Supplementary material for: Feature engineering with clinical expert knowledge: A case study assessment of machine learning model complexity and performance
Source: PubMed Central journal article supplement (PMC7179831; doi:10.1371/journal.pone.0231300), 2020-04-23
Supplement: pone.0231300.s003.pdf [file pone.0231300.s003.pdf]

**S3 Table. Top 20 prescription triplets ranked by discriminative score.**

| Anchor prescription event | Laboratory test name                      | $MI_{score}$ | Relevant to case study? |
|---------------------------|-------------------------------------------|--------------|-------------------------|
| Xopenex                   | Oxygen saturation                         | 0.17         | Y                       |
| Budesonide                | Hemoglobin                                | 0.16         | N                       |
| Albuterol Sulfate         | Bicarbonate                               | 0.16         | Y                       |
| Albuterol Sulfate         | Sodium                                    | 0.15         | N                       |
| Methylprednisolone        | Glucose                                   | 0.14         | N                       |
| Albuterol Sulfate         | Glucose                                   | 0.14         | N                       |
| Salmeterol                | pH                                        | 0.12         | Y                       |
| Budesonide                | Mean corpuscular hemoglobin concentration | 0.11         | N                       |
| Budesonide                | Bilirubin                                 | 0.10         | N                       |
| Albuterol Sulfate         | Blood urea nitrogen                       | 0.09         | N                       |
| Albuterol Sulfate         | Mean corpuscular volume                   | 0.09         | N                       |
| Budesonide                | Mean corpuscular hemoglobin               | 0.09         | N                       |
| Xopenex                   | Monocytes                                 | 0.08         | N                       |
| Methylprednisolone        | Hematocrit                                | 0.08         | N                       |
| Albuterol Sulfate         | Hematocrit                                | 0.08         | N                       |
| Albuterol Sulfate         | Calcium                                   | 0.08         | N                       |
| Budesonide                | White blood cell count                    | 0.08         | N                       |
| Methylprednisolone        | Magnesium                                 | 0.08         | N                       |
| Methylprednisolone        | Anion gap                                 | 0.08         | N                       |
| Xopenex                   | CO2 (ETCO2, PCO2, etc.)                   | 0.08         | Y                       |

$MI_{score}$  = mutual information score
