# Supplementary material for: Feature engineering with clinical expert knowledge: A case study assessment of machine learning model complexity and performance
Source: PubMed Central journal article supplement (PMC7179831; doi:10.1371/journal.pone.0231300), 2020-04-23
Supplement: pone.0231300.s004.pdf [file pone.0231300.s004.pdf]

**S4 Table. Top 20 procedure triplets ranked by discriminative score.**

| <b>Anchor procedure</b>                              | <b>Laboratory test name event</b>         | $MI_{score}$ | Relevant to case study? |
|------------------------------------------------------|-------------------------------------------|--------------|-------------------------|
| Extubation                                           | Basophils                                 | 0.30         | N                       |
| Peritoneal Dialysis                                  | Bicarbonate                               | 0.28         | N                       |
| Peritoneal Dialysis                                  | Prothrombin time                          | 0.22         | N                       |
| Nuclear Medicine                                     | Mean corpuscular hemoglobin concentration | 0.20         | N                       |
| Unplanned Line/ Catheter Removal (Patient Initiated) | Glucose                                   | 0.18         | N                       |
| Paracentesis                                         | Glucose                                   | 0.17         | N                       |
| Cardioversion/Defibrillation                         | Mean corpuscular hemoglobin concentration | 0.16         | N                       |
| Percutaneous Tracheostomy                            | Prothrombin time                          | 0.16         | N                       |
| Dialysis Catheter                                    | Lactate dehydrogenase                     | 0.15         | N                       |
| Extubation                                           | Positive end-expiratory pressure          | 0.15         | N                       |
| Unplanned Extubation (patient-initiated)             | Partial pressure of carbon dioxide        | 0.15         | Y                       |
| Lumbar Puncture                                      | Glucose                                   | 0.14         | N                       |
| Unplanned Extubation (patient-initiated)             | Mean corpuscular volume                   | 0.14         | N                       |
| Unplanned Extubation (patient-initiated)             | Hemoglobin                                | 0.13         | N                       |
| Unplanned Extubation (patient-initiated)             | Hematocrit                                | 0.13         | N                       |
| Lumbar Puncture                                      | pH                                        | 0.13         | N                       |
| Unplanned Extubation (patient-initiated)             | Mean corpuscular hemoglobin concentration | 0.12         | N                       |
| Thoracentesis                                        | CO2 (ETCO2, PCO2, etc.)                   | 0.12         | Y                       |
| Temporary Pacemaker Wires Discontinued               | Hemoglobin                                | 0.12         | N                       |
| Unplanned Extubation (patient-initiated)             | Glucose                                   | 0.11         | N                       |

$MI_{score}$  = mutual information score
