# Supplementary material for: Feature engineering with clinical expert knowledge: A case study assessment of machine learning model complexity and performance
Source: PubMed Central journal article supplement (PMC7179831; doi:10.1371/journal.pone.0231300), 2020-04-23
Supplement: pone.0231300.s005.pdf [file pone.0231300.s005.pdf]

**S5 Table. Laboratory Tests Found in List of Clinically Meaningful triplets**

| Laboratory Test Name               | Procedure triplets (N=55) | Prescription triplets (N=27) |
|------------------------------------|---------------------------|------------------------------|
| Bicarbonate                        | 10                        | 7                            |
| Blood urea nitrogen                | 2                         | 0                            |
| CO2 (ETCO2, PCO2, etc.)            | 9                         | 4                            |
| Creatinine                         | 2                         | 0                            |
| Lactate                            | 5                         | 1                            |
| Oxygen saturation                  | 4                         | 3                            |
| Partial pressure of carbon dioxide | 9                         | 4                            |
| pH                                 | 11                        | 6                            |
| Positive end-expiratory pressure   | 0                         | 2                            |
| Potassium                          | 2                         | 0                            |
| White blood cell count             | 1                         | 0                            |
