# Supplementary material for: Feature engineering with clinical expert knowledge: A case study assessment of machine learning model complexity and performance
Source: PubMed Central journal article supplement (PMC7179831; doi:10.1371/journal.pone.0231300), 2020-04-23
Supplement: pone.0231300.s006.pdf [file pone.0231300.s006.pdf]

**S6 Table. Forty-two Laboratory Tests Used in Gradient Boosting Experiments, sorted by weight**

| Laboratory Test                           | Weight* | Relevant to case study? |
|-------------------------------------------|---------|-------------------------|
| Blood culture                             | 0.08    | N                       |
| Cholesterol                               | 0.06    | N                       |
| Red blood cell count                      | 0.06    | N                       |
| Creatinine                                | 0.06    | Y                       |
| Glucose                                   | 0.04    | N                       |
| Lactate                                   | 0.04    | Y                       |
| Calcium                                   | 0.04    | N                       |
| Lactate dehydrogenase                     | 0.03    | N                       |
| Prothrombin time                          | 0.03    | N                       |
| pH                                        | 0.03    | Y                       |
| Partial pressure of carbon dioxide        | 0.03    | Y                       |
| Partial thromboplastin time               | 0.02    | N                       |
| Potassium                                 | 0.02    | Y                       |
| Eosinophils                               | 0.02    | N                       |
| Asparate aminotransferase                 | 0.02    | N                       |
| Blood urea nitrogen                       | 0.02    | Y                       |
| Hemoglobin                                | 0.02    | N                       |
| Sodium                                    | 0.02    | N                       |
| Hematocrit                                | 0.02    | N                       |
| Mean corpuscular hemoglobin               | 0.02    | N                       |
| Mean corpuscular hemoglobin concentration | 0.02    | N                       |
| Chloride                                  | 0.02    | N                       |
| Neutrophils                               | 0.02    | N                       |
| Oxygen saturation                         | 0.02    | Y                       |
| Monocytes                                 | 0.02    | N                       |
| Alkaline phosphate                        | 0.02    | N                       |
| Magnesium                                 | 0.02    | N                       |
| Bilirubin                                 | 0.01    | N                       |
| Alanine aminotransferase                  | 0.01    | N                       |
| Bicarbonate                               | 0.01    | Y                       |
| Lymphocytes                               | 0.01    | N                       |
| White blood cell count                    | 0.01    | Y                       |
| Albumin                                   | 0.01    | N                       |
| Phosphate                                 | 0.01    | N                       |
| Basophils                                 | 0.01    | N                       |
| Mean corpuscular volume                   | 0.01    | N                       |
| Positive end-expiratory pressure          | 0.01    | Y                       |
| Platelets                                 | 0.01    | N                       |
| CO2 (ETCO2, PCO2, etc.)                   | 0.01    | Y                       |
| Anion gap                                 | 0.01    | N                       |
| Troponin-I                                | 0.01    | N                       |
| Troponin-T                                | 0.00    | N                       |

\*Weight according to Gradient Boosting model
