# Supplementary material for: Feature engineering with clinical expert knowledge: A case study assessment of machine learning model complexity and performance
Source: PubMed Central journal article supplement (PMC7179831; doi:10.1371/journal.pone.0231300), 2020-04-23
Supplement: pone.0231300.s007.pdf [file pone.0231300.s007.pdf]

**S7 Table. Forty-two Laboratory Tests Used in Logistic Regression Experiments, sorted by weight**

| Laboratory Test                           | Weight* | Relevant to case study? |
|-------------------------------------------|---------|-------------------------|
| Mean corpuscular hemoglobin concentration | 3.89    | N                       |
| Bicarbonate                               | 3.35    | Y                       |
| Hematocrit                                | 3.21    | N                       |
| Anion gap                                 | 3.08    | N                       |
| Glucose                                   | 3.05    | N                       |
| Prothrombin time                          | 2.69    | N                       |
| Chloride                                  | 2.65    | N                       |
| Calcium                                   | 2.59    | N                       |
| Mean corpuscular volume                   | 2.56    | N                       |
| Hemoglobin                                | 2.49    | N                       |
| Asparate aminotransferase                 | 2.49    | N                       |
| Sodium                                    | 2.33    | N                       |
| White blood cell count                    | 2.32    | Y                       |
| Mean corpuscular hemoglobin               | 2.30    | N                       |
| Lactate dehydrogenase                     | 2.03    | N                       |
| Phosphate                                 | 2.01    | N                       |
| CO2 (ETCO2* PCO2* etc.)                   | 1.98    | Y                       |
| Lymphocytes                               | 1.93    | N                       |
| Monocytes                                 | 1.85    | N                       |
| Potassium                                 | 1.78    | Y                       |
| Basophils                                 | 1.61    | N                       |
| Partial pressure of carbon dioxide        | 1.59    | Y                       |
| Blood urea nitrogen                       | 1.50    | Y                       |
| Oxygen saturation                         | 1.49    | Y                       |
| Magnesium                                 | 1.40    | N                       |
| Red blood cell count                      | 1.32    | N                       |
| Neutrophils                               | 1.30    | N                       |
| pH                                        | 1.24    | Y                       |
| Platelets                                 | 1.23    | N                       |
| Positive end-expiratory pressure          | 1.19    | Y                       |
| Bilirubin                                 | 1.18    | N                       |
| Alanine aminotransferase                  | 1.03    | N                       |
| Alkaline phosphate                        | 0.93    | N                       |
| Lactate                                   | 0.87    | Y                       |
| Creatinine                                | 0.87    | Y                       |
| Partial thromboplastin time               | 0.77    | N                       |
| Cholesterol                               | 0.69    | N                       |
| Eosinophils                               | 0.14    | N                       |
| Troponin-I                                | 0.09    | N                       |
| Troponin-T                                | 0.06    | N                       |
| Albumin                                   | 0.05    | N                       |
| Blood culture                             | 0.00    | N                       |

\*Weight is  $MI_{score}$  sum
